# Supplementary material for: An EGFR/HER2-targeted conjugate sensitizes gemcitabine-sensitive and resistant pancreatic cancer through different SMAD4-mediated mechanisms
Source: PubMed Central journal article supplement (PMC9489697; doi:10.1038/s41467-022-33037-x), 2022-09-20
Supplement: 41467_2022_33037_MOESM1_ESM.pdf [file 41467_2022_33037_MOESM1_ESM.pdf]

## **Supplementary Information for**

### **An EGFR/HER2-targeted conjugate sensitizes gemcitabine-sensitive and resistant pancreatic cancer through different SMAD4-mediated mechanisms**

|                                    |          |
|------------------------------------|----------|
| <b>Supplementary Figure 1.....</b> | <b>2</b> |
| <b>Supplementary Figure 2.....</b> | <b>3</b> |
| <b>Supplementary Figure 3.....</b> | <b>4</b> |
| <b>Supplementary Figure 4.....</b> | <b>5</b> |
| <b>Supplementary Table 1.....</b>  | <b>6</b> |
| <b>Supplementary Table 2.....</b>  | <b>7</b> |
| <b>Supplementary Table 3 .....</b> | <b>8</b> |
| <b>Supplementary Table 4.....</b>  | <b>9</b> |
| <b>Supplementary Table 5.....</b>  | <b>9</b> |

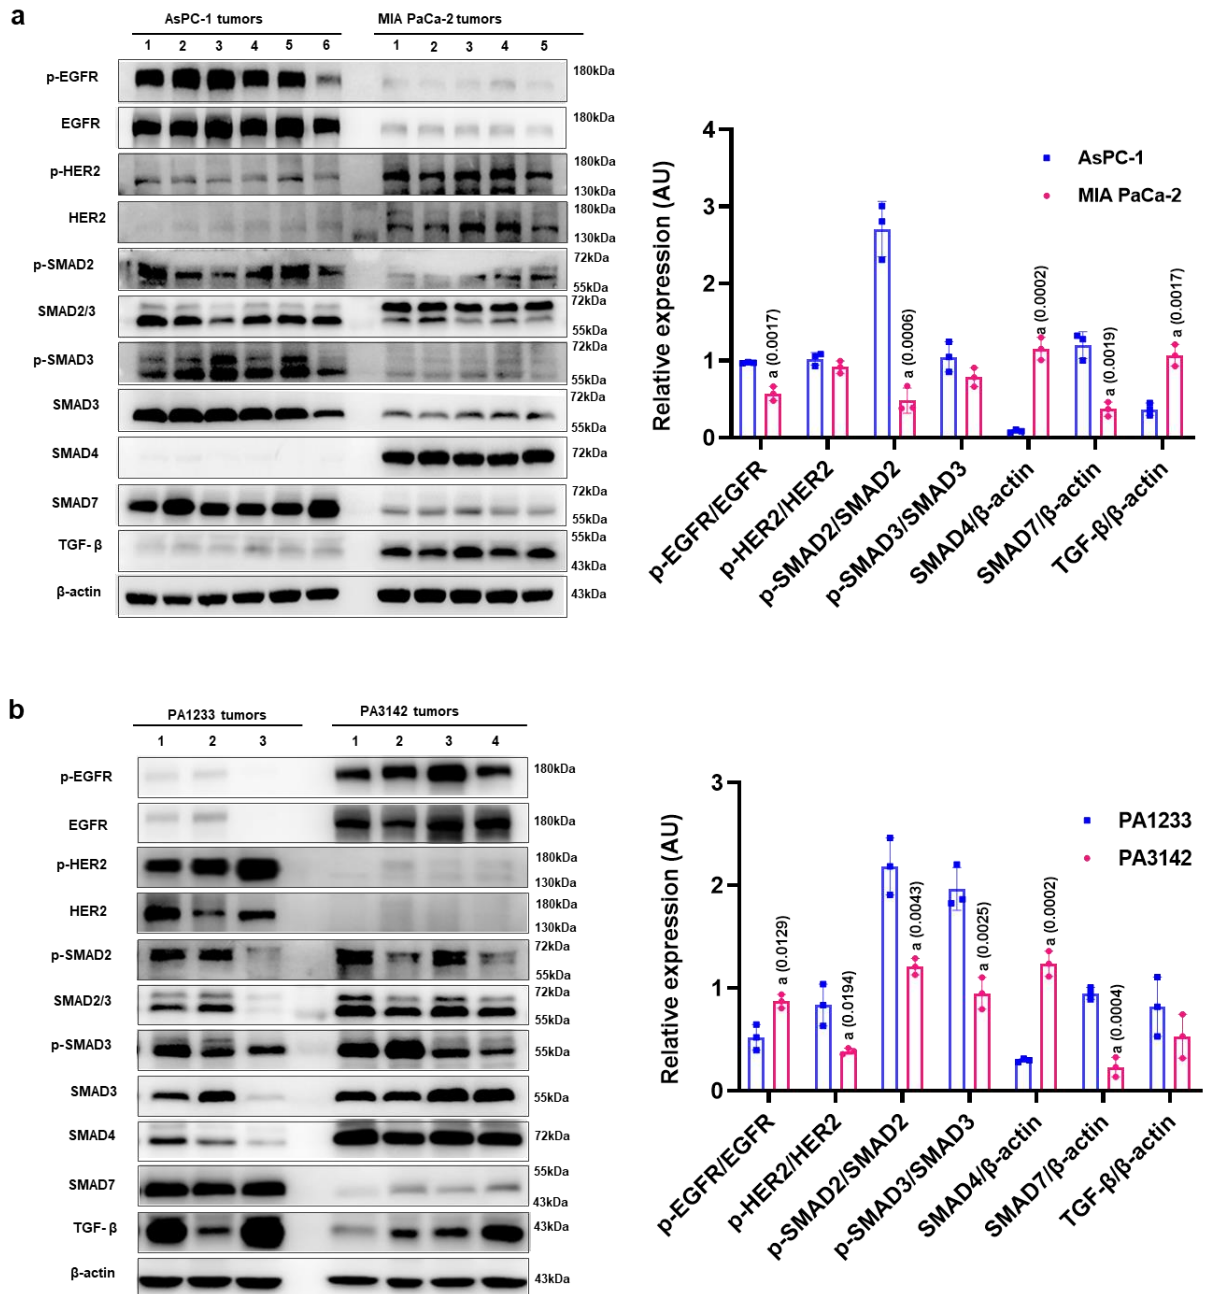

**Supplementary Figure 1. Basal protein levels of tumor tissue samples were determined in Western blot assays by using either CDX (a) or PDX (b) models.** The protein levels of EGFR, HER2, SMAD2, SMAD3, SMAD4, SMAD7 and TGF- $\beta$  in tumor tissue without treatment were detected by Western blot analysis. Band intensities were quantified using Image J. Data are representative of biologically independent replicates as the mean  $\pm$ SD (n = 6 for AsPC-1 tumors, n = 5 for MIA PaCa-2 tumors, n = 3 for PA1233 tumors and n = 4 for PA3142 tumors). Note: ‘a’ indicates  $p < 0.05$  as compared with the AsPC-1 xenografts model or PA1233 model. Two-sided, paired-samples t-test was used in Supplementary Figure 1a, 1b. All significant p values are shown in parentheses behind letter “a”. Source data are provided as a Source Data file.

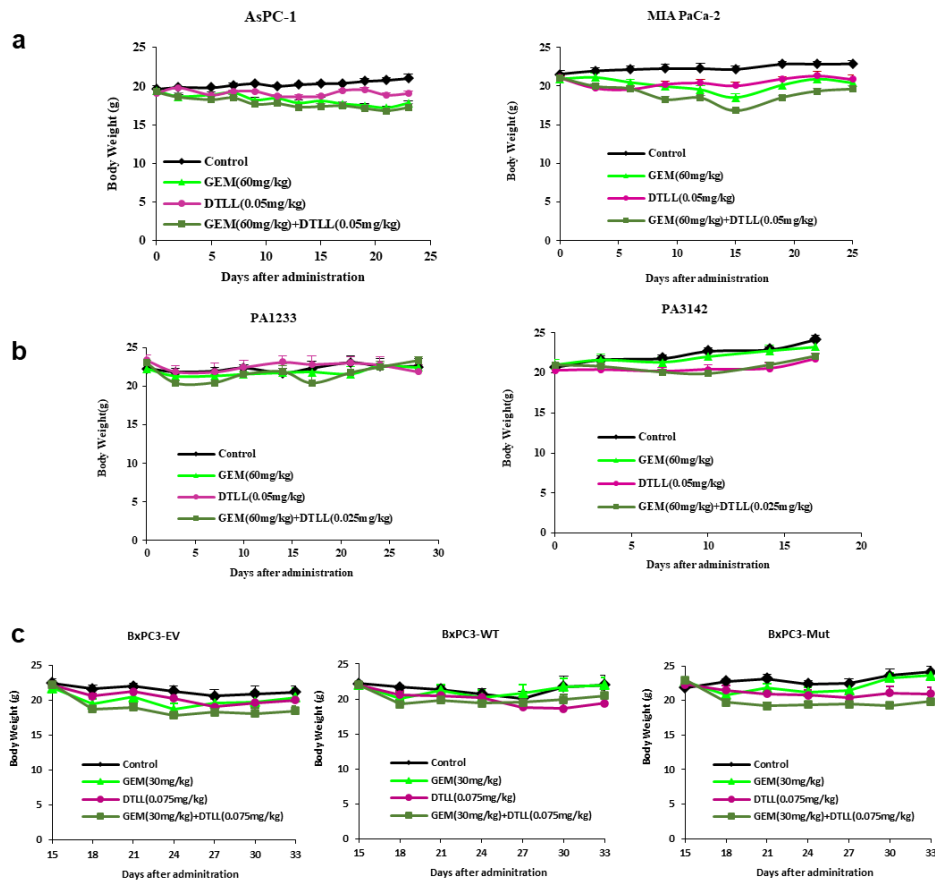

**Supplementary Figure 2. Changes in mouse body weight in AsPC-1 and MIA PaCa-2 cell line-derived xenograft (CDX) models (a), patient-derived xenograft (PDX) models (b) and BxPC3-EV, BxPC3-WT and BxPC3-Mut stably transfected cell line-derived xenograft (CDX) models (c) after treatment with GEM, DTLL or both drugs.** In AsPC-1 and MIA PaCa-2 xenograft models, the mice were received equal volume of physiological saline (Control group), 60 mg/kg gemcitabine intraperitoneally administered once a week (GEM group), 0.05 mg/kg DTLL at the LDM-equivalent dose intravenously administered every ten day (DTLL group) and 60 mg/kg gemcitabine combining with 0.05 mg/kg DTLL (GEM +DTLL group); In PA1233 and PA3142 models, the mice were received equal volume of physiological saline (Control group), 60 mg/kg gemcitabine every four day (GEM group), 0.05 mg/kg DTLL once a week (DTLL group) and 60 mg/kg gemcitabine combining with 0.025 mg/kg DTLL (GEM + DTLL group). In those three BxPC-3 xenografts models, the mice were received equal volume of physiological saline (Control group), 30 mg/kg gemcitabine intraperitoneally administered every four day (GEM group), 0.075 mg/kg DTLL at the LDM-equivalent dose intravenously administered once a week (DTLL group) and 30 mg/kg gemcitabine combining with 0.075 mg/kg DTLL (GEM+DTLL group). Data are representative of biologically independent replicates as the mean  $\pm$ SEM (n =6 for AsPC-1 tumors, n =5 for MIA PaCa-2 tumors, n =3 for PA1233 tumors, n =4 for PA3142 tumors and n =5 for BxPC3 tumors). Source data are provided as a Source Data file.

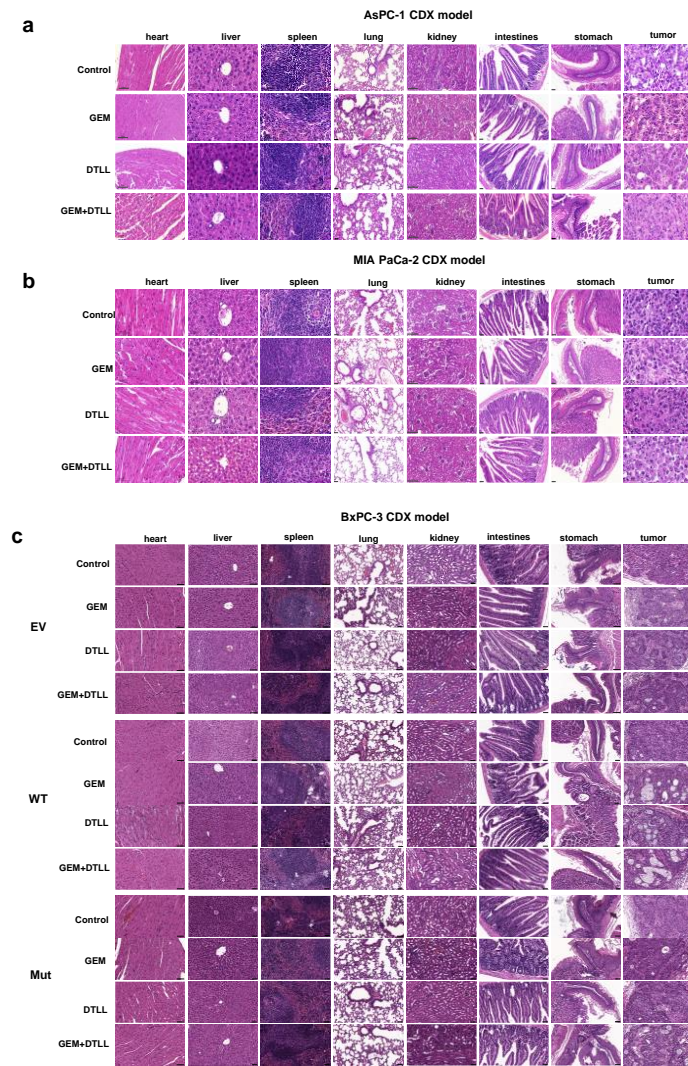

**Supplementary Figure 3. Histopathological examination for tumor tissues and various organs of AsPC-1 (a), MIA paca-2(b) and BxPC3 cells with stable expression of wild-type and mutant SMAD4 (c) xenograft-bearing mice treated with GEM, DTLL and both (H & E staining, ×200).** The sections of tumor tissue and major organs, including the heart, liver, spleen, lung, kidney, intestines, and stomach were stained by the routine hematoxylin–eosin staining method, and then were photographed for the histopathology assay. Scale bars indicate 50 μm. In AsPC-1 and MIA PaCa-2 xenografts model, the mice were received equal volume of physiological saline (Control group), 60 mg/kg gemcitabine intraperitoneally administered once a week (GEM group), 0.05 mg/kg DTLL at the LDM-equivalent dose intravenously administered every ten day (DTLL group) and 60 mg/kg gemcitabine combining with 0.05 mg/kg DTLL (GEM+DTLL group). In those three BxPC-3 xenografts models, the mice were received equal volume of physiological saline (Control group), 30 mg/kg gemcitabine intraperitoneally administered every four day (GEM group), 0.075 mg/kg DTLL at the LDM-equivalent dose intravenously administered once a week (DTLL group) and 30 mg/kg gemcitabine combining with 0.075 mg/kg DTLL (GEM+DTLL group). Images are representative of three biologically independent replicates with a scale bar representing 50μm. Source data are provided as a Source Data file.

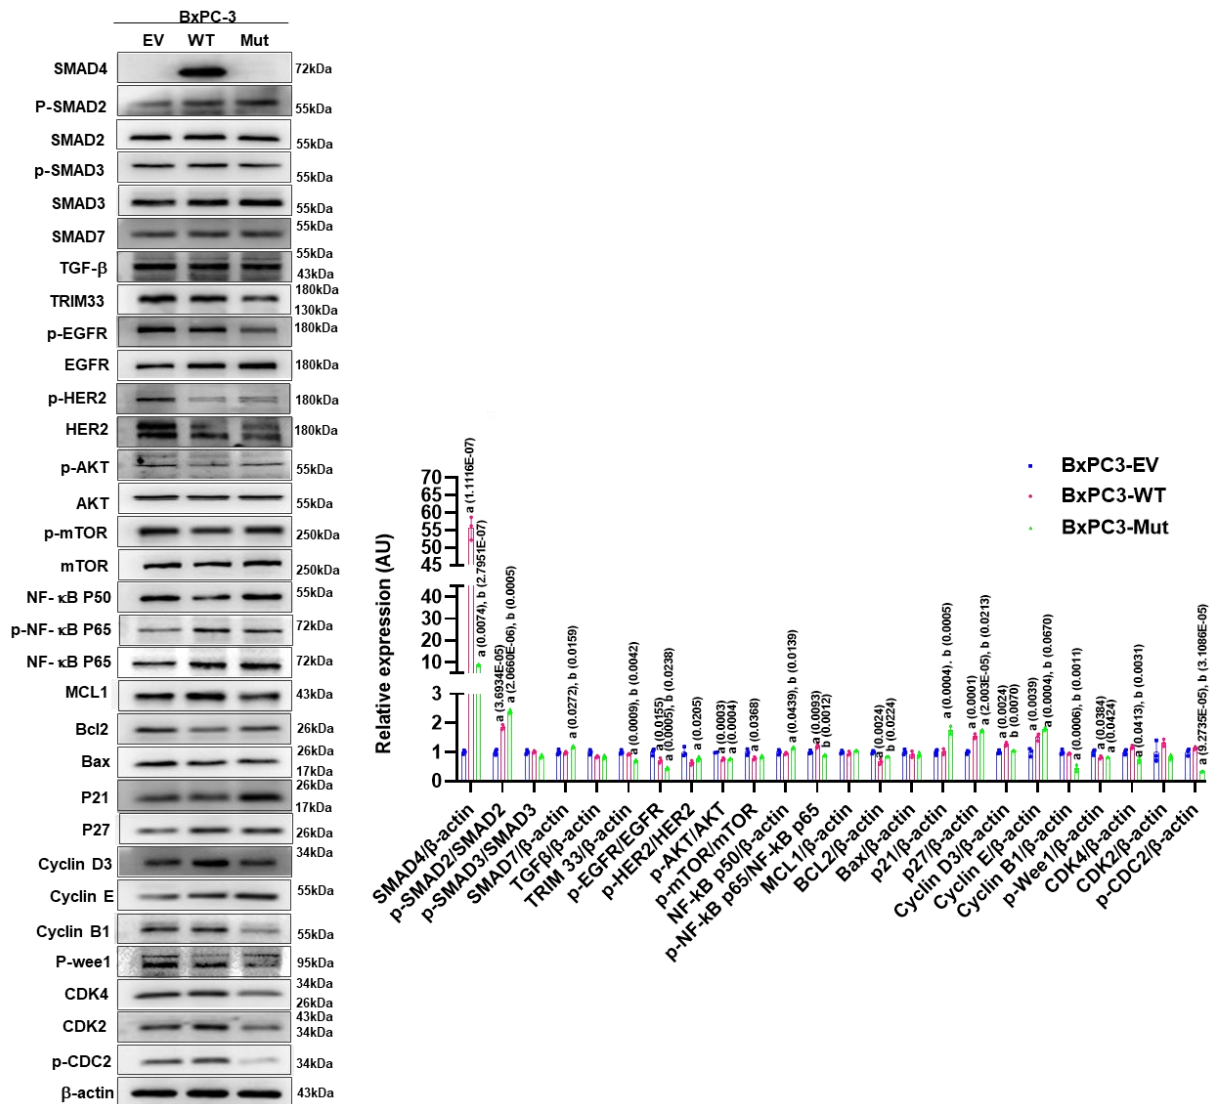

**Supplementary Figure 4. Difference in protein expression levels in BxPC3-EV, BxPC3-WT and BxPC3-Mut stably transfected cells.** The protein expression of SMAD4, SMAD2, SMAD3, SMAD7, TGF-β, TRIM33, EGFR, HER2, AKT, mTOR, NF-κB, MCL1, Bcl2, BAX, P21, P27, Cyclin D, Cyclin E, Cyclin B, p-Wee1, CDK2, CKK4 and p-CDC2 were detected by Western blot analysis. Data are shown as mean ± SD from three biologically independent samples (n =3). Note: ‘a’ indicates p<0.05 as compared with the BxPC3-EV group and ‘b’, p<0.05 compared with the BxPC3-WT group. One-way ANOVA with Bonferroni post hoc test was used. All significant P values are shown in parentheses behind letter “a” or “b”. Source data are provided as a Source Data file.

**Supplementary Table 1. Therapeutic efficacy of the combination of DTLL and GEM against pancreatic carcinoma in both CDX and PDX mouse models**

| Models     | Treatment groups                 | Number | Tumor volume (mm <sup>3</sup> ) | Inhibition rate (%)         |
|------------|----------------------------------|--------|---------------------------------|-----------------------------|
|            |                                  |        | Mean±SEM                        | Mean±SEM                    |
| AsPC-1     | Control                          | 6      | 1079.31±80.72                   | -                           |
|            | GEM(60mg/kg)                     | 6      | 798.12±55.38                    | 26.05±5.13 <sup>a</sup>     |
|            | DTLL (0.05mg/kg)                 | 6      | 649.76±40.80                    | 39.80±3.78 <sup>a</sup>     |
|            | GEM(60mg/kg) + DTLL (0.05mg/kg)  | 6      | 356.63±37.92                    | 66.96±3.51 <sup>a,b,c</sup> |
| MIA PaCa-2 | Control                          | 5      | 1538.97±172.35                  | -                           |
|            | GEM(60mg/kg)                     | 5      | 630.32±63.60                    | 59.04±4.13 <sup>a</sup>     |
|            | DTLL (0.05mg/kg)                 | 5      | 313.57±63.86                    | 79.62±3.79 <sup>a,b</sup>   |
|            | GEM(60mg/kg) + DTLL (0.05mg/kg)  | 5      | 182.43±34.83                    | 88.15±2.09 <sup>a,b</sup>   |
| PA1233     | Control                          | 3      | 719.47±108.21                   | -                           |
|            | GEM(60mg/kg)                     | 3      | 635.64±87.28                    | 11.65±12.13                 |
|            | DTLL (0.05mg/kg)                 | 3      | 489.03±131.00                   | 31.54±18.21                 |
|            | GEM(60mg/kg) + DTLL (0.025mg/kg) | 3      | 199.68±79.24                    | 72.25±11.01 <sup>a,b</sup>  |
| PA3142     | Control                          | 4      | 2653.11±54.20                   | -                           |
|            | GEM(60mg/kg)                     | 4      | 1210.63±224.30                  | 54.37±8.45 <sup>a</sup>     |
|            | DTLL (0.05mg/kg)                 | 4      | 1313.27±184.69                  | 50.50±6.96 <sup>a</sup>     |
|            | GEM(60mg/kg) + DTLL (0.025mg/kg) | 4      | 605.65±129.37                   | 77.17±16.95 <sup>a,c</sup>  |

In AsPC-1 and MIA PaCa-2 xenograft models, the mice were received equal volume of physiological saline (Control group), 60 mg/kg gemcitabine intraperitoneally administered once a week (GEM group), 0.05 mg/kg DTLL at the LDM-equivalent dose intravenously administered every ten day (DTLL group) and 60 mg/kg gemcitabine combining with 0.05 mg/kg DTLL (GEM +DTLL group). In PA1233 and PA3142 models, the mice were received equal volume of physiological saline (Control group), 60 mg/kg gemcitabine every four day (GEM group), 0.05 mg/kg DTLL once a week (DTLL group) and 60 mg/kg gemcitabine combining with 0.025 mg/kg DTLL (GEM + DTLL group). Data are representative of biologically independent replicates as the mean ± SEM. Note: ‘a’ indicates p<0.05 as compared with the control, ‘b’, p<0.05 compared with the GEM group and ‘c’, p<0.05 compared with the DTLL group. In either AsPC-1 or MIA PaCa-2 CDX models, p<0.001 for ‘GEM+DTLL’ versus Control, ‘GEM+DTLL’ versus GEM, DTLL versus Control and GEM versus Control. In AsPC-1 CDX model, p<0.001 for ‘GEM+DTLL’ versus DTLL. In PA3142 model, p<0.001 for ‘GEM+DTLL’ versus Control. One-way ANOVA with Bonferroni test was used. Source data are provided as a Source Data file.

**Supplementary Table 2. Therapeutic efficacy of the combination of DTLL and GEM against pancreatic carcinoma in CDX mouse models derived from BxPC-3 cells with SMAD4 stable overexpression vectors**

| Models    | Treatment groups                 | Number | Tumor volume (mm <sup>3</sup> ) | Inhibition rate (%)         |
|-----------|----------------------------------|--------|---------------------------------|-----------------------------|
|           |                                  |        | Mean±SEM                        | Mean±SEM                    |
| BxPC3-EV  | Control                          | 5      | 731.31±65.53                    | -                           |
|           | GEM (30mg/kg)                    | 5      | 522.44±24.90                    | 28.56±3.41 <sup>a</sup>     |
|           | DTLL (0.075mg/kg)                | 5      | 467.38±39.07                    | 36.09±5.34 <sup>a</sup>     |
|           | GEM(30mg/kg)+DTLL (0.075mg/kg)   | 5      | 282.88±18.95                    | 61.32±2.59 <sup>a,b,c</sup> |
| BxPC3-WT  | Control                          | 5      | 1118.80±67.14                   | -                           |
|           | GEM(30mg/kg)                     | 5      | 387.99±22.89                    | 65.32±2.05 <sup>a</sup>     |
|           | DTLL (0.075mg/kg)                | 5      | 456.62±50.34                    | 59.19±4.50 <sup>a</sup>     |
|           | GEM(30mg/kg) + DTLL (0.075mg/kg) | 5      | 200.83±17.67                    | 82.05±1.58 <sup>a,b,c</sup> |
| BxPC3-Mut | Control                          | 5      | 956.12±63.07                    | -                           |
|           | GEM(30mg/kg)                     | 5      | 884.98±51.70                    | 7.44±5.41                   |
|           | DTLL (0.075mg/kg)                | 5      | 500.99±31.39                    | 47.60±3.28 <sup>a,b</sup>   |
|           | GEM(30mg/kg) + DTLL (0.075mg/kg) | 5      | 204.57±24.22                    | 78.60±2.53 <sup>a,b,c</sup> |

In those three BxPC-3 xenografts models, the mice were received equal volume of physiological saline (Control group), 30 mg/kg gemcitabine intraperitoneally administered every four day (GEM group), 0.075 mg/kg DTLL at the LDM-equivalent dose intravenously administered once a week (DTLL group) and 30 mg/kg gemcitabine combining with 0.075 mg/kg DTLL (GEM+DTLL group). Data are representative of biologically independent replicates as the mean ± SEM. Note: ‘a’ indicates  $p < 0.05$  as compared with the control, ‘b’,  $p < 0.05$  compared with the GEM group and ‘c’,  $p < 0.05$  compared with the DTLL group. In BxPC3-EV, BxPC3-WT and BxPC3-Mut models,  $p < 0.001$  for ‘GEM+DTLL’ versus Control, ‘GEM+DTLL’ versus DTLL and DTLL versus Control. In BxPC3-EV model,  $p < 0.001$  for ‘GEM+DTLL’ versus GEM and GEM versus Control. In BxPC3-WT model,  $p < 0.001$  for GEM versus Control. In BxPC3-Mut model,  $p < 0.001$  for ‘GEM+DTLL’ versus GEM. One-way ANOVA with Bonferroni test was use. Source data are provided as a Source Data file.

**Supplementary Table 3. Twelve detectable protein levels of gemcitabine-relevant transporters or pharmacokinetic enzymes in BxPC3-Mut and BxPC3-WT cells with treatments of control, gemcitabine, DTLL and both drugs with treatments of control, gemcitabine, DTLL and both drugs in proteomics analysis.**

| PG. Genes | PG. Protein Accessions ID | BxPC3-Mut_Control vs BxPC3-WT_Control |          | BxPC3-Mut cells |          |                 |          |                     |          | BxPC3-WT cells |          |                 |          |                     |          |
|-----------|---------------------------|---------------------------------------|----------|-----------------|----------|-----------------|----------|---------------------|----------|----------------|----------|-----------------|----------|---------------------|----------|
|           |                           |                                       |          | Gem vs Control  |          | DTLL vs Control |          | DTLL+Gem vs Control |          | Gem vs Control |          | DTLL vs Control |          | DTLL+Gem vs Control |          |
|           |                           | Fold change                           | P value  | Fold change     | P value  | Fold change     | P value  | Fold change         | P value  | Fold change    | P value  | Fold change     | P value  | Fold change         | P value  |
| ABCC1     | P33527                    | 0.878                                 | 5.89E-02 | 1.082           | 2.53E-01 | 0.942           | 4.90E-01 | 1.168               | 1.72E-01 | 1.206          | 6.22E-02 | 1.061           | 8.29E-02 | 1.026               | 4.88E-01 |
| CDA       | P32320                    | 0.769                                 | 2.87E-02 | 0.867           | 7.19E-02 | 0.803           | 8.01E-02 | 0.639               | 8.45E-03 | 0.977          | 7.90E-01 | 1.043           | 5.02E-01 | 1.175               | 1.41E-01 |
| CDC5L     | Q99459                    | 0.883                                 | 2.31E-02 | 1.076           | 1.03E-01 | 1.090           | 9.82E-02 | 1.082               | 8.58E-02 | 1.040          | 1.02E-01 | 0.863           | 8.75E-03 | 0.871               | 5.16E-03 |
| CMPK1     | P30085                    | 1.229                                 | 1.67E-03 | 0.987           | 8.42E-01 | 0.877           | 5.30E-02 | 0.910               | 1.32E-01 | 1.012          | 7.14E-01 | 1.008           | 4.68E-01 | 1.039               | 1.76E-01 |
| DCK       | D6RFG8                    | 0.899                                 | 1.93E-01 | 1.649           | 1.18E-03 | 0.996           | 9.51E-01 | 1.259               | 1.60E-02 | 1.234          | 5.18E-02 | 0.896           | 3.61E-01 | 0.877               | 6.48E-02 |
| DCTD      | P32321                    | 1.062                                 | 3.05E-01 | 1.085           | 1.95E-01 | 1.062           | 3.36E-01 | 1.043               | 5.26E-01 | 1.026          | 1.27E-01 | 1.031           | 6.16E-02 | 1.068               | 6.99E-03 |
| NT5C      | Q8TCD5                    | 1.232                                 | 4.31E-03 | 0.968           | 3.29E-01 | 1.023           | 5.30E-01 | 0.909               | 7.85E-02 | 1.006          | 8.67E-01 | 1.028           | 2.78E-01 | 1.087               | 7.16E-02 |
| NT5C2     | P49902                    | 0.989                                 | 6.56E-01 | 1.107           | 1.92E-02 | 0.997           | 9.77E-01 | 1.190               | 1.54E-02 | 1.015          | 6.98E-01 | 1.067           | 6.97E-02 | 1.045               | 3.45E-02 |
| NT5C3A    | Q9H0P0                    | 0.963                                 | 4.87E-01 | 1.646           | 2.79E-04 | 1.064           | 1.19E-01 | 1.122               | 2.84E-03 | 1.113          | 9.74E-02 | 0.971           | 5.76E-01 | 0.950               | 3.60E-01 |
| RRM1      | P23921                    | 0.589                                 | 1.30E-03 | 1.897           | 4.37E-04 | 0.607           | 2.37E-03 | 0.713               | 6.15E-03 | 1.027          | 6.76E-01 | 0.578           | 2.71E-04 | 0.534               | 4.47E-05 |
| RRM2      | P31350                    | 0.222                                 | 3.15E-06 | 6.409           | 5.57E-06 | 1.622           | 2.16E-04 | 4.028               | 1.92E-05 | 1.331          | 3.43E-03 | 0.473           | 1.15E-04 | 0.480               | 1.96E-05 |
| SLC29A1   | Q99808                    | 0.712                                 | 5.77E-02 | 1.490           | 6.53E-02 | 0.569           | 3.71E-02 | 0.960               | 8.60E-01 | 1.221          | 3.50E-02 | 0.679           | 1.55E-02 | 0.574               | 3.09E-04 |
| SMAD4     | K7EIU8                    | 0.017                                 | 1.69E-06 | 1.150           | 3.52E-01 | 7.260           | 4.40E-05 | 4.835               | 4.45E-05 | 1.013          | 9.61E-01 | 1.269           | 2.21E-01 | 1.315               | 7.04E-02 |

Note: Each cell sample in triplicates was collected and conducted in proteomic analysis. The average of area value was used for protein quantification. The difference between groups was analyzed by T-test with two sides and adjusted using Benjamin Hochberg correction, and p <0.05 was considered to be statistically significant.



**Supplementary Table 4. Sequences of oligonucleotides for SMAD4-specific siRNAs and a scramble siRNA.**

| Name                    | DNA sequence                   |
|-------------------------|--------------------------------|
| SMAD4 siRNA-1           | 5'-AGAUGAAUUGGAUUCUUUAdTdT-3'  |
| SMAD4 siRNA-2           | 5'-GUGUGCAGUUGGAAUGUAAAdTdT-3' |
| SMAD4 siRNA-3           | 5'-GUACUUCAUACCAUGCCGAdTdT-3'  |
| SMAD4 siRNA-4           | 5'-CAUCCUAGUAAAUGUGUUAdTdT-3'  |
| Scrambled siRNA (si-NC) | 5'-ACGCGUAACGCGGGAAUUUdTdT-3'  |

**Supplementary Table 5. Sequences of oligonucleotides for primers used for real time qRT-PCR.**

| Gene name | Forward primer                | Reverse primer               |
|-----------|-------------------------------|------------------------------|
| SMAD4     | 5' -TCCAGCCTCCCATTCCAAT-3'    | 5' -ACCTTGCTCTCTCAATGGCT-3'  |
| TRIM33    | 5' -AAATGCAAACCGAGGTCCCA-3'   | 5' -CCAGGAGTGCATCATCGGAA-3'  |
| P50       | 5' -GCTTAGGAGGGAGAGCCAC-3'    | 5' -AGGACGTTGTGTTCCCTCCG-3'  |
| P65       | 5' -TTCTTTCGCCGAAGTCAGGG-3'   | 5' -GCTGCTCGCTTGTCTTTTCG-3'  |
| FADD      | 5' -TCTACCTCCGAAGCGTCCTGAT-3' | 5' -AGGTGGTCTGTGGCTCACTCA-3' |
| BCL2      | 5' -CTTTGAGTTCGGTGGGGTCA-3'   | 5' -GAAATCAAACAGAGGCCGCA-3'  |
| MCL1      | 5' -AACGCGGTAATCGGACTCAA-3'   | 5' -CCTCCTTCTCCGTAGCCAAA-3'  |
| BAX       | 5' -TCATGGGCTGGACATTGGAC-3'   | 5' -GCGTCCCAAAGTAGGAGAGG-3'  |
| GAPDH     | 5' -GCAAATTCCATGGCACCGT-3'    | 5' -TCGCCCCACTTGATTTTGG-3'   |
