# Supplementary material for: An EGFR/HER2-targeted conjugate sensitizes gemcitabine-sensitive and resistant pancreatic cancer through different SMAD4-mediated mechanisms
Source: PubMed Central journal article supplement (PMC9489697; doi:10.1038/s41467-022-33037-x), 2022-09-20
Supplement: 41467_2022_33037_MOESM4_ESM.pdf [file 41467_2022_33037_MOESM4_ESM.pdf]

## **Description of Additional Supplementary Files**

File Name: Supplementary Data 1

Description: The raw data used for clinical information on gemcitabine treatment in this study were downloaded from the TCGA-PAAD Project of TCGA public datasets

File Name: Supplementary Data 2

Description: The raw data used for SMAD4 expression data of pancreatic cancer patients in this study were downloaded from the TCGA-PAAD Project of TCGA public datasets

File Name: Supplementary Data 3

Description: All the proteomic raw data of BxPC3-Mut and -WT cells with or without drug treatments in this study
